# Supplementary material
Source: publisher figshare collection journal article supplement (https://karger.figshare.com/ndownloader/files/8715973)
Supplement: Supplementary file 1 [file 8715973]

*Supplementary Table*: Study characteristics of included studies

Table organized by WHO region. NR=Not Reported

| **Author** | **Year Published** | **Country** | **Study Design** | **Study Period** | **Study Duration (years)** | **Sample Size** | **Study Population** | **Avg. Age** | **M:F Ratio** | **Extent of Injury** | **When Was Mortality Assessed?** | **In-Hospital Mortality** | **Overall SMR** | **Median Survival** |
| --- | --- | --- | --- | --- | --- | --- | --- | --- | --- | --- | --- | --- | --- | --- |
| [Ahidjo](#RANGE!_ENREF_80) [82] | 2011 | Nigeria | Prospective Cohort | 2009 | 1 | 168 | TSCI | 36.4 | 7.8 | NS | Within the first 6 weeks of admission | - | - | - |
| [Ahoniemi [84]](#RANGE!_ENREF_81) | 2011 | Finland | Retrospective Cohort | 1976-2005 | 29 | 1647 | TSCI | NR | 4.78 | ASIA | Not specified | - | 2.65 | - |
| [Augutis [83]](#RANGE!_ENREF_105) | 2003 | Sweden | Retrospective Cohort | 1985-1996 | 11 | 92 | TSCI | 11.8 (survivors) | 1.04 | ASIA | Within 1 year post-injury | 25% |  |  |
| [Buechner [61]](#RANGE!_ENREF_59) | 2000 | USA | Retrospective Cohort | 1994-1998 | 4 | 277 | TSCI | NR | 2.01 | NS | At discharge | 7.9% | - | - |
| Boakye  [62] | 2008 | USA | Retrospective Cohort | 1993-2002 | 9 | 99856 | TSCI | NR | 2.63 | Level of Injury | At discharge | 5.7% | - | - |
| [Cao [36]](#RANGE!_ENREF_37) | 2013 | USA | Retrospective Cohort | 1995-2011 | 6 | 8183 | TSCI | NR | 3.88 | ASIA | Jun-11 | - | - | - |
| [Cao [37]](#RANGE!_ENREF_38) | 2013 | USA | Retrospective Cohort | 1998-2009 | 11 | 2685 | TSCI | NR | 2.89 | Frankel | 2009 | - | 3.6 | 4.58 |
| [Catz [72]](#RANGE!_ENREF_70) | 2002 | Israel | Retrospective Cohort | 1959-1992 | 33 | 250 | TSCI | 34.5 | 3.1 | Frankel | 5-years post-injury (n=34) and at the end of the study period (n=69) | - | - | 36.5 |
| [Claridge [38]](#RANGE!_ENREF_39) | 2006 | USA | Retrospective Cohort | 1996-2003 | 7 | 492 | TSCI | 33 | 5.56 | Level of Injury | Between admittance to trauma center and discharge to another facility | 7.7% | - | - |
| [Conway [85]](#RANGE!_ENREF_82) | 2007 | Scotland | Prospective Cohort | 1998-1999 | 1 | 319 | NTSCI - Malignant Cord Compression | 65 (median) | 1.7 | NS | 1 month after diagnosis of MCC | - | - | 0.16 |
| [Couris [63]](#RANGE!_ENREF_60) | 2010 | Canada | Retrospective Cohort | 2003-2007 | 4 | 936 | TSCI | 51.3 | 2.87 | Level of Injury | During index admission, at discharge | 11.7% | - | - |
| DeVivo [54] | 2007 | USA | Consecutive Case Series with Prospective Component | 1973-2006 | 33 | 24332 | TSCI | 38.3 (2002-2006) | 3.46 (2002-2006) | ASIA | Every 5 years after study inclusion | - | - | - |
| DeVivo [55] | 2012 | USA | Retrospective Cohort | 1935-2008 | 73 | 45442 | TSCI | 37.1 (2005-2008) | - | ASIA | Every 5 years after study inclusion | - | - | - |
| [Divanoglou [106]](#RANGE!_ENREF_103) | 2010 | Greece | Prospective Cohort | 2006-2007 | 1 | 61 | TSCI | 62 | 7.71 | ASIA | Within 1 year of injury, if survived 7 days | - | - | - |
| [Divanoglou [106]](#RANGE!_ENREF_103) | 2010 | Sweden | Prospective Cohort | 2006-2007 | 1 | 30 | TSCI | NR | - | ASIA | Within 1 year of injury, if survived 7 days | - | - | - |
| [Dryden [17]](#RANGE!_ENREF_17) | 2005 | Canada | Retrospective Cohort | 1992-1994 | 2 | 233 | TSCI | 34 (median) | 3.09 | NS | At the end of 6 year follow-up | 8.6% | - | - |
| [Dryden [64]](#RANGE!_ENREF_61) | 2004 | Canada | Prospective Cohort | 1994-2007 | 13 | 233 | TSCI | 34 (median) | 3.09 | Level and Completeness of Injury | Initial hospitalization | 8.6% | - | - |
| [Espagnacq [79]](#RANGE!_ENREF_77) | 2011 | France | Prospective Cohort | 1995-2006 | 11 | 1241 | Cervical TSCI | 30.7 | 4 | Level and Completeness of Injury | 3-May-07 | - | - | - |
| [Fassett [39]](#RANGE!_ENREF_40) | 2007 | USA | Retrospective Cohort | 1978-2005 | 27 | 3481 | TSCI | NR | - | ASIA | On discharge | 6.1% | - | - |
| [Fatunde [86]](#RANGE!_ENREF_83) | 2006 | Nigeria | Retrospective Cohort | 1989-2004 | 15 | 110 | Paraplegic NTSCI | 5.3 | 0.96 | NS | On discharge | 7.2% | - | - |
| [Feng [87]](#RANGE!_ENREF_84) | 2011 | China | Retrospective Cohort | 1998-2009 | 11 | 239 | TSCI | 45.4 | 4.2 | ASIA | On discharge | 3.4% | - | - |
| [Findley [18]](#RANGE!_ENREF_18) | 2011 | USA | Retrospective Cohort | 1994-2004 | 5 | 8344 | TSCI | NR | 52.4 | Para vs. Tetra |  | - | - | - |
| [Fielingsdorf [88]](#RANGE!_ENREF_85) | 2007 | South Africa | Prospective Cohort | 2003-2004 | 1 | 101 | Cervical TSCI | 34.69 | 4.94 | ASIA | Acute phase - up to 1 year after injury | - | - | - |
| [Frisbie [40]](#RANGE!_ENREF_41) | 2010 | USA | Restrospective Cohort | 1998-2007 | 9 | 322 | TSCI & NTSCI | NR | 79.5 | ASIA | 1 year after the end of the study period - 2008 | - | - | - |
| [Furlan [65]](#RANGE!_ENREF_62) | 2009 | Canada | Retrospective Cohort | 1996-2007 | 11 | 297 | TSCI | 52.1 | 2.71 | ASIA | On discharge | 5.7% | - | - |
| [Furlan [66]](#RANGE!_ENREF_63) | 2005 | Canada | Prospective Cohort | 1998-2000 | 2 | 55 | Acute Cervical TSCI | NR | 2.24 | ASIA | On discharge | 9% | - | - |
| [Garshick [41]](#RANGE!_ENREF_42) | 2005 | USA | Prospective Cohort | 1994-2000 | 6 | 361 | TSCI & NTSCI | NR | - | ASIA | Median of 55.6 months, until 12/31/2000 | - | 1.47 | - |
| Gosselin [99] | 2005 | Sierra Leone | Retrospective Cohort | 2002-2004 | 2 | 24 | TSCI | 30 | 11 | NS | At discharge, and after discharge (between 10-28 months) | 29.2% | - | - |
| [Greenwell [42]](#RANGE!_ENREF_43) | 2007 | USA | Retrospective Cohort | 1993-1998 | 5 | 219 | Chronic SCI - Not Spec. | 54 | 218 | Para vs. Tetra | Mar-04 | - | - | - |
| [Gulati [89]](#RANGE!_ENREF_86) | 2011 | UK | Retrospective Cohort | 2000-2005 | 5 | 39 | TSCI | NR | - | ASIA | On discharge | 23.1% | - | - |
| [Guo [43]](#RANGE!_ENREF_44) | 2003 | USA | Retrospective Cohort | 1996-1998 | 2 | 60 | NTSCI - MSCC | NA | - | NS | 2000 | - | - | 0.35 |
| [Hagen [10]](#RANGE!_ENREF_10) | 2010 | Norway | Retrospective Cohort | 1952-2008 | 56 | 401 | TSCI | 42.7 | 4.73 | ASIA | from 1952 until 31 August 2008 | - | 1.85 | 7.4 |
| [Imai [90]](#RANGE!_ENREF_87) | 2004 | Japan | Retrospective Cohort | 1965-1995 | 30 | 960 | TSCI | 30.1 | - | NS | Initial time of residency at Workshops | - | 2.8 | - |
| [Knutsdottir [91]](#RANGE!_ENREF_88) | 2012 | Iceland | Retrospective Cohort | 1975-2009 | 34 | 207 | TSCI | 38 | 2.63 | ASIA | 31-Dec-09 | - | - | - |
| [Krassioukov [67]](#RANGE!_ENREF_64) | 2003 | Canada | Retrospective Cohort | 1998-2000 | 2 | 58 | TSCI | 55.4 | 2.87 | ASIA | Not specified, during admission to hospital | 10.3% | - | - |
| [Krause [46]](#RANGE!_ENREF_115) | 2004 | USA | Prospective Cohort | 1995-2002 |  | 5947 | TSCI |  | 4.05 | ASIA |  | - | - | - |
| [Krause [45]](#RANGE!_ENREF_15) | 2011 | USA | Prospective Cohort | 1995-2009 | 4 | 8027 | TSCI |  | 3.85 | ASIA | Mar-09 | - | - | - |
| [Krause [44]](#RANGE!_ENREF_45) | 2010 | USA | Prospective Cohort | 1997-1998 | 1 | 1303 | TSCI | 31.7 | 2.84 | ASIA | 31-Dec-07 | - | - | - |
| [Leal-Filho [92]](#RANGE!_ENREF_89) | 2008 | Brazil | Prospective Cohort | 1995-2002 | 7 | 386 | TSCI | Not provided | 6.28 | Frankel | On discharge | 11.9% | - | - |
| [Lenehan [68]](#RANGE!_ENREF_65) | 2012 | Canada | Retrospective Observational Study Using Prospectively Collected Population-Based Data | 1995-2004 | 9 | 930 | TSCI | 35 (median) | 4 | ASIA | On discharge | 3.1% | - | - |
| [Lhéritier [80]](#RANGE!_ENREF_78) | 2001 | France | Retrospective Cohort | 1949-1999 | 50 | 697 | Cervical TSCI | 31 | 5.51 | ASIA | 30-Nov-99 | - | - | 35.6 (Incomplete)42.5 (Complete) |
| Liang [93] | 2001 | Taiwan | Retrospective Cohort | 1989-1997 | 8 | 109 | Cervical TSCI | 45.1 | 6.3 | Frankel | Not specified, some point in 1998 | - | - | - |
| [Lidal [19]](#RANGE!_ENREF_19) | 2007 | Norway | Retrospective Cohort | 1961-2002 | 41 | 387 | TSCI | 27.9 (median) | 4.86 | Frankel | 31-Dec-02 | - | - | - |
| [Loblaw [69]](#RANGE!_ENREF_66) | 2003 | Canada | Retrospective Cohort | 1990-1995 | 5 | 3458 | NTSCI - MSCC | 62 (median) | 1.33 | NS | Not clearly specified | - | - | 2.9 |
| [Macias [47]](#RANGE!_ENREF_47) | 2009 | USA | Retrospective Cohort | 2001 | 1 | 4121 | TSCI | 45.3 (trauma centers - state discharge data) | 2.51 | ASIA | At discharge | 7.5% | - | - |
| [Mak [48]](#RANGE!_ENREF_48) | 2011 | USA | Retrospective Cohort | 1998-2006 | 8 | 75876 | NTSCI - MSCC | 62.1 | 1.67 | NS | At discharge | 9.6% | - | - |
| [Martin [49]](#RANGE!_ENREF_49) | 2011 | USA | Retrospective Cohort | 2005-2009 | 4 | 244 | Cervical TSCI | 52 | 2.21 | ASIA | At discharge | 10% | - | - |
| [Middleton [9]](#RANGE!_ENREF_9) | 2012 | Australia | Retrospective Cohort | 1955-2006 | 51 | 2014 | TSCI | 34 | 4.46 | ASIA | After 12 months | - | 1.93 | - |
| [Neumann [94]](#RANGE!_ENREF_91) | 2009 | Brazil | Retrospective Cohort | 2001-2005 | 4 | 84 | Cervical TSCI | 37.8 | 5.46 | Frankel modified by ASIA | At discharge | 26% | - | - |
| [New [76]](#RANGE!_ENREF_74) | 2007 | Australia | Retrospective Cohort | 1995-1997 | 2 | 70 | NTSCI | Men: 64 (median); Woman: 72.5 (median) | 0.84 | ASIA | At discharge | 11.4% | - | - |
| [Ning [103]](#RANGE!_ENREF_100) | 2011 | China | Retrospective Cohort | 2004-2008 | 4 | 869 | TSCI | 46 | 2.63 | ASIA | At discharge | 1.4% | - | - |
| [Nwadinigwe [101]](#RANGE!_ENREF_98) | 2004 | Nigeria | Retrospective Cohort | 1996-2001 | 5 | 104 | TSCI | 39.2 | 5.5 | NS | At discharge | 34.6% | - | - |
| [Nwankwo [100]](#RANGE!_ENREF_97) | 2003 | Nigeria | Prospective Cohort | 1996-2000 | 5 | 74 | Unclear |  | - | Frankel | At the end of 12 weeks | 10.8% | - | - |
| [O'Connor [77]](#RANGE!_ENREF_75) | 2005 | Australia | Retrospective Cohort | 1986-1997 | 11 | 2892 | TSCI | NS | 4.01 | ASIA | 31-Dec-98 | - | - | - |
| Pagliacci [95] | 2007 | Italy | Prospective Cohort | 1997-1999 | 2 | 511 | TSCI | 41.9 | 4 | ASIA | At follow-up | - | - | - |
| [Pickelsimer [50]](#RANGE!_ENREF_50) | 2010 | USA | Retrospective Cohort | 1996-2005 | 9 | 988 | TSCI | Men: 39; Women 44.8 | 2.84 | ASIA | Excluding deaths that occurred within 90 days after discharge | - | - | - |
| [Pickett[70]](#RANGE!_ENREF_67) | 2006 | Canada | Retrospective Cohort | 2001-1997 | 4 | 151 | TSCI | 42.2 | 2.87 | ASIA | On discharge | 8.0% | - | - |
| [Pietraszkiewicz [102]](#RANGE!_ENREF_99) | 2010 | Poland | Retrospective Cohort | 2005-2008 | 3 | 58 | TSCI | N.S. | 2.8 | Lesion Level | Unclear | 10.3% | - | - |
| [Pirouzmand [71]](#RANGE!_ENREF_68) | 2010 | Canada | Retrospective Cohort | 1986-2006 | 20 | 2841 | TSCI | 33 (median) | 3.08 | level | Not clearly specified | - | - | - |
| [Prusmack [51]](#RANGE!_ENREF_51) | 2006 | USA | Retrospective Cohort | 1997-2002 | 5 | 138 | TSCI | 44 | 3.6 | ASIA | Not clearly specified | - | - | - |
| [Ronen [75]](#RANGE!_ENREF_73) | 2004 | Israel | Retrospective Cohort | 1962-2000 | 38 | 1085 | NTSCI | 47.8 | 1.23 | Frankel | May-01 | - | - | 24 |
| [Sabre [7]](#RANGE!_ENREF_7) | 2013 | Estonia | Retrospective Cohort | 2001-1997 | 4 | 244 | TSCI | 38.9 | 5.97 | ASIA | 14-Oct-11 | - | 5.00 | 2.79 |
| [Sabre [7]](#RANGE!_ENREF_7) | 2013 | Norway | Retrospective Cohort | 2001-1997 | 4 | 71 | TSCI | 48.9 | 3.44 | ASIA | 14-Oct-11 | - | 1.89 | 4 |
| [Saunders [52]](#RANGE!_ENREF_52) | 2009 | USA | Retrospective Cohort | 1981-1998 | 17 | 4353 | TSCI | - | 2.63 | ASIA | Not specified, retrospective | 5.5% | - | - |
| [Scovil [96]](#RANGE!_ENREF_93) | 2012 | Nepal | Prospective Cohort | 2007-(2009 – 11-27 month follow-up) | 2 | 37 | TSCI & NTSCI | 32 | 2.1 | NS | Not clearly specified | - | - | - |
| [Seguin[81]](#RANGE!_ENREF_79) | 2012 | France | Retrospective & Prospective Cohort | 1998-2008 | 10 | 131 | TSCI | 36 (<65); 75 (>65) | 3.36 | Frankel, ASIA | Not clearly specified | 12.2% | - | 3.75 |
| [Selassie [53]](#RANGE!_ENREF_53) | 2013 | USA | Retrospective Cohort | 1998-2009 | 11 | 3389 | TSCI | 45.5 | 3 | ASIA | Death within 120 of acquiring TSCI | 8.0% | - | - |
| [Shao [97]](#RANGE!_ENREF_94) | 2011 | China | Retrospective Cohort | 1995-2008 | 3 | 1163 | TSCI | 48.3 | 5.15 | ASIA | Not clearly specified | - | - | - |
| [Shavelle [60]](#RANGE!_ENREF_54) | 2007 | USA | Retrospective Cohort | 1973-2004 | 31 | 25340 | TSCI | 32 | - | ASIA | 1-Jan-04 | - | - | - |
| [Shavelle [59]](#RANGE!_ENREF_58) | 2006 | USA | Prospective Cohort | 1973-2003 | 30 | 319 | Ventilator-dependent TSCI |  | 4.6 | ASIA | March-April 2004 | - | - | - |
| [Soden [78]](#RANGE!_ENREF_76) | 2000 | Australia | Retrospective Cohort | 1973-1994 | 21 | 132 | TSCI | NA | - | Frankel | Within 18 months -- 132 deaths | - | - | - |
| [Sokolowski [56]](#RANGE!_ENREF_55) | 2007 | USA | Retrospective Cohort | - | 12 | 979 | Cervical - TSCI | 44.6 | 2.61 | NS | At discharge | 6% | - | - |
| [Solagberu [104]](#RANGE!_ENREF_101) | 2002 | Nigeria | Retrospective Cohort | 1995-1999 | 4 | 39 | TSCI | 37.3 | 12 | Frankel | At discharge | 25.6% | - | - |
| [Strauss [57]](#RANGE!_ENREF_56) | 2006 | USA | Retrospective Cohort | 1973-2004 | 31 | 30822 | TSCI | Not provided | 3.69 | ASIA | 1-Jan-04 | - | - | - |
| [Tchvaloon [73]](#RANGE!_ENREF_71) | 2008 | Israel | Retrospective Cohort | 1962-2004 | 42 | 143 | TSCI | 37.8 | 4.95 | Frankel | 2004 | - | - | 43 |
| [Thietje [107]](#RANGE!_ENREF_104) | 2011 | Germany | Retrospective Cohort | 1942-1995 | 53 | 3314 | TSCI | 32 (<50 yrs at death; <=10 yrs post injury) | - | ASIA | 268 died in total, 62 died >=10 yrs after SCI and were <50 (mort & survival data reflects 62) | 1.1% | - | - |
| [van Asbeck [98]](#RANGE!_ENREF_95) | 2000 | The Netherlands | Retrospective Cohort | 1994-1994 | 1 | 113 | TSCI | NS | 3.35 | NS | On discharge after inital hospitalization for SCI | 15.9% | - | - |
| [Varma [58]](#RANGE!_ENREF_57) | 2010 | USA | Retrospective Cohort | 1993-2003 | 10 | 1995 | TSCI | 41 (median) | 2.98 | Frankel | At discharge | 12.6% | - | - |
| [Wu [105]](#RANGE!_ENREF_102) | 2012 | China | Retrospective Cohort | 2008-2011 | 3 | 143 | Cervical TSCI | 54.6 | 5 | ASIA | At discharge | 4% | - | - |
| [Zeilig [74]](#RANGE!_ENREF_72) | 2000 | Israel | Retrospective Cohort | 1948-2008 | 50 | 20 | TSCI | 22.6 | 19 | ASIA | Not clearly specified | - | - | - |
